# Supplementary figures and images for: Technical note: Development of an extraction protocol and colorimetric analysis for alginate in marine sediment
Source: Copernicus journal article supplement (doi:10.5194/egusphere-2025-4577), 2025-10-01

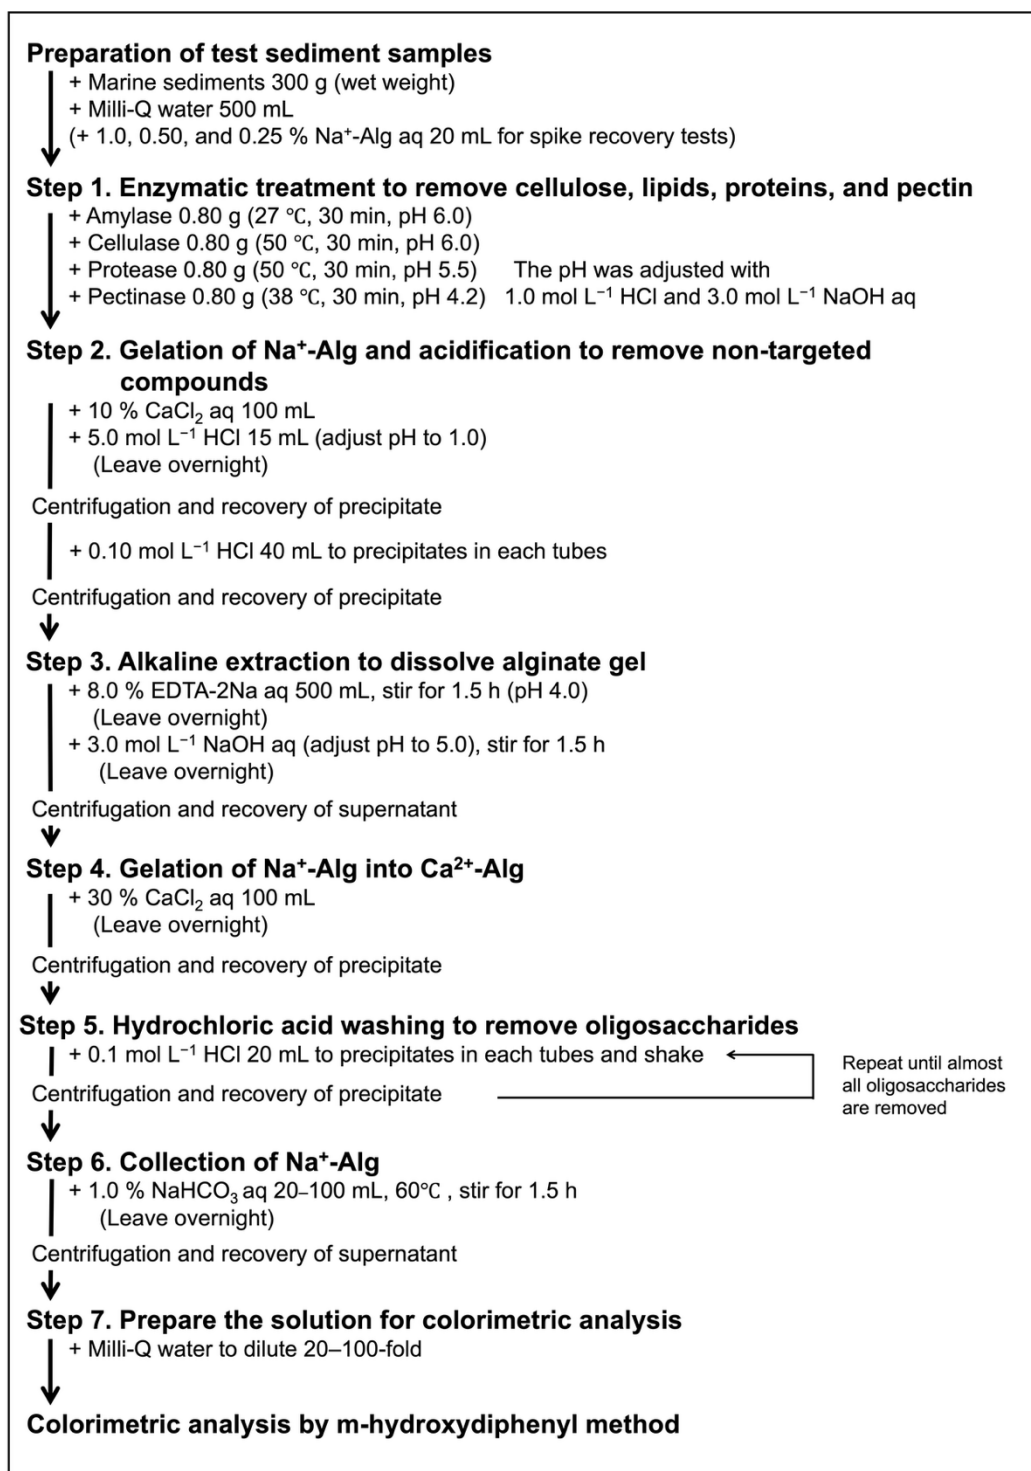

Figure S1: A complete overview of the modified extraction protocol.

Supplement: Supplementary file 1 [file egusphere-2025-4577-supplement.pdf]
